# Supplementary material for: Nicotinic Acid Adenine Dinucleotide Phosphate (NAADP) Induces Intracellular Ca2+ Release through the Two-Pore Channel TPC1 in Metastatic Colorectal Cancer Cells
Source: PubMed Central journal article supplement (PMC6521149; doi:10.3390/cancers11040542), 2019-04-15

## Supplementary Materials: Nicotinic Acid Adenine Dinucleotide Phosphate (NAADP) Induces Intracellular Ca<sup>2+</sup> Release Through the Two-Pore Channel TPC1 in Metastatic Colorectal Cancer Cells

Pawan Faris, Giorgia Pellavio, Federica Ferulli, Francesca Di Nezza, Mudhir Shekha, Dmitry Lim, Marcello Maestri, Germano Guerra, Luigi Ambrosone, Paolo Pedrazzoli, Umberto Laforenza, Daniela Montagna and Francesco Moccia

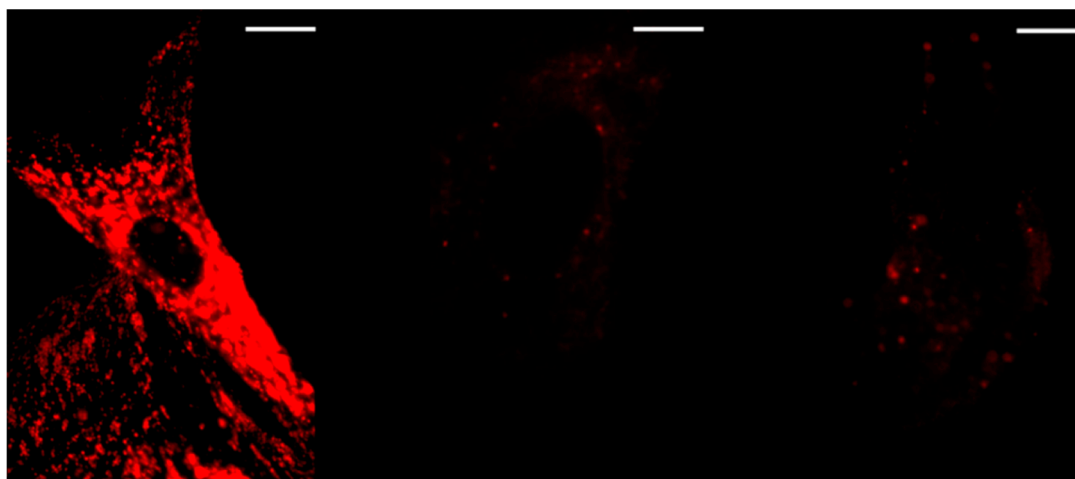

**Figure S1.** Disruption of acidic stores prevents LysoTracker Red staining of mCRC cells. mCRC cells loaded with LysoTracker Red (50 nM) in the absence or presence of GPN (200  $\mu$ M, 30 min) or nigericin (50  $\mu$ M, 30 min). The calibration bar is 5  $\mu$ m.

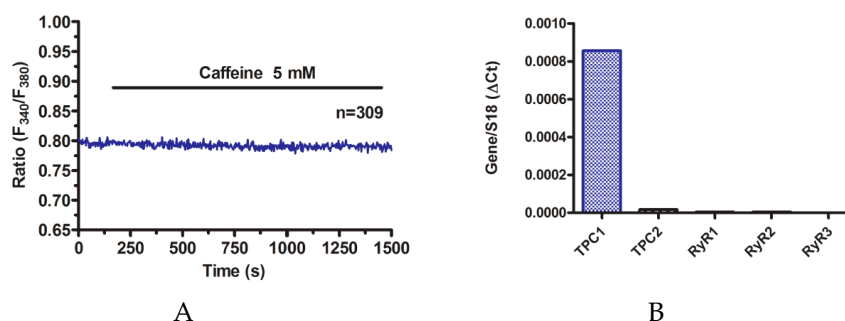

**Figure S2.** RyRs are absent in mCRC cells. **A**, caffeine (5 mM), a selective RyR agonist, did not increase the [Ca<sup>2+</sup>]<sub>i</sub> in mCRC cells. **B**, A qRT-PCR revealed that, while TPC1 transcripts were abundantly expressed, TPC2, RyR1, RyR2 and RyR3 transcripts were undetectable in mCRC cells. Transcripts were normalized to the expression of Ribosomal Protein S18 mRNAs and expressed as mean  $\pm$  SE.

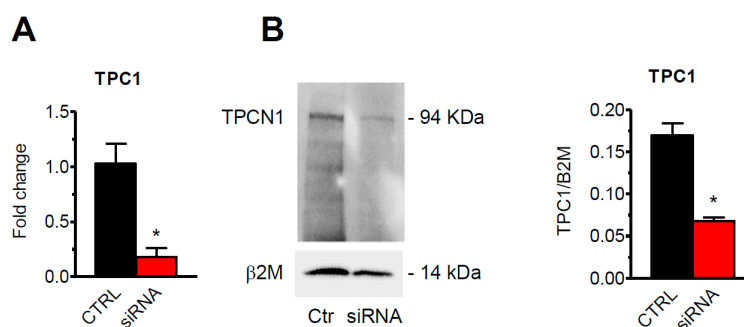

**Figure S3.** Genetic silencing of TPC1 through a specific siRNA in mCRC cells. Left panel, short interfering RNA (siRNA) and scrambled siRNA (CTRL) were transfected in mCRC cells as described in Materials and methods.

Blots representative of four were shown. Lanes were loaded with 30 µg of proteins, probed with affinity purified antibodies and processed as described in Materials and Methods. The same blots were stripped and re-probed with anti-beta-2-microglobulin (β2M) polyclonal antibody, as housekeeping. Major bands of the expected molecular weights were indicated. Right panel, densitometric analysis of the bands revealed a significant reduced CHRM5 protein expression in silenced cells compared to controls. The asterisk indicates  $p < 0.05$  (Student's t test). Densitometry was performed by Total Lab V 1.11 computer program (Amersham Biosciences Europe, Italy) and the results were normalized to the corresponding β2M.

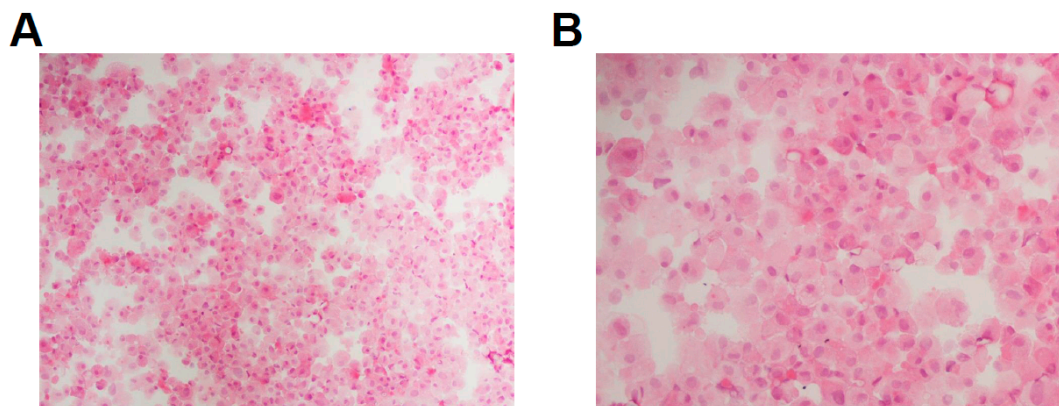

**Figure S4.** Immunohistochemically characterization of mCRC cells. mCRC cells were evaluated after 4–6 in vitro passages (corresponding to the timeline in which the cells were employed for molecular analysis). Cytokeratin immunofluorescence analyses of primary cultures derived from 1 patient at fifth passage (Panel A, magnification  $\times 20$ , and Panel B magnification  $\times 100$ ) are shown.

**Table S1.** Primer sequences used for real time reverse transcription/polymerase chain reaction.

| Gene |         | Primers sequences             | Size (bp) | Annealing T (°C) |
|------|---------|-------------------------------|-----------|------------------|
| TPC1 | Forward | 5'-GAGTTTGGATGACGACGTGC-3'    | 132       | 58               |
|      | Reverse | 5'-GAGTCGTGGATGGCATAAGCT-3'   |           |                  |
| TPC2 | Forward | 5'-CTTACCGCAGCATCCAAGTC-3'    | 140       | 58               |
|      | Reverse | 5'-GTAAAGCCACATCGAGCTGG-3'    |           |                  |
| RyR1 | Forward | 5'-CTTCCTGGAGCCCACTAGC-3'     | 115       | 60               |
|      | Reverse | 5'-CGTGTTAGCCAGCATCTCCT-3'    |           |                  |
| RyR2 | Forward | 5'-CCGCAACCATCCACAAAGAA-3'    | 127       | 60               |
|      | Reverse | 5'-AAGGTGCAGATGGAGAGGTC-3'    |           |                  |
| RyR3 | Forward | 5'-CGCCACCATTTCATAAGGAGC-3'   | 158       | 60               |
|      | Reverse | 5'-GGGCTCTGACAGATAGGGAC-3'    |           |                  |
| S18  | Forward | 5'-TGCGAGGTAICTCAACACCAACA-3' | 108       | 95               |
|      | Reverse | 5'-CTGCTTTCCTCAACACCACA-3'    |           |                  |

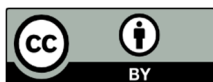

Supplement: cancers-11-00542-s001.pdf [file cancers-11-00542-s001.pdf]
